# Supplementary material for: A Practical Guide to Using Time-and-Motion Methods to Monitor Compliance With Hand Hygiene Guidelines: Experience From Tanzanian Labor Wards
Source: PubMed Central journal article supplement (PMC7784080; doi:10.9745/ghsp-d-20-00221), 2020-12-23
Supplement: 20-00221-Gon-Supplement1.pdf [file 20-00221-Gon-Supplement1.pdf]

## **Supplement 1. HANDS at Birth Tool**

### **Room (room where you are sitting)**

- Labor room
- Antenatal rom
- Vaginal examination (VE) room
- Other room

### **Context (availability of equipment and in-charge presence)**

- Drying materials available
  - None
  - Single use
- Soap available
  - None
  - At the sink
  - Not near the sink
- Water available
  - None
  - Basin pour
  - Tap in room
  - Tap in next room
- Gloves available
  - None
  - In the room
- Alcohol handrub available
  - None
  - In the room
- In charge
  - Yes
  - No

### **Birth attendant (BA) status in room**

- BA leaves
- BA enters

### **Woman**

- 1
- 2
- other
  - 3
  - 4
  - 5
  - 6
  - 7
  - 8

Supplement to: Gon G, Ali SM, Aunger R, et al. A practical guide to using time-and-motion methods to monitor compliance with hand hygiene guidelines: experience from Tanzanian labor wards. *Glob Health Sci Pract.* 2020;8(4). <https://doi.org/10.9745/GHSP-D-20-00221>

- 9
- 10
- 11
- 12

### **Touched**

- Macintosh/kanga (bed cover)
  - With body fluids
  - Clean
  - Not clean
  - Don't know
- Equipment (for delivery)
  - Sterile
  - With body fluids
  - After decontamination up to sterilization (any)
  - Don't know
- Other sterile/clean (e.g., cotton swabs)
- Body fluids–contaminated objects
  - Carry away placenta
  - Cloth for cleaning the bed
  - Other
- Objects (other)
  - Register, paper, or pen
  - Bag
  - Bin
  - Patient bed
  - Trolley
  - Tap
  - Phone
  - Mop or other cleaning material
  - Gloves pack
  - Own body
  - Other (unclean)
- Patient (woman or baby) (everything but inside legs and perineal area)

### **Delivery**

- Delivery
  - Normal
  - Vacuum
- Kit
  - Premade or collected prior to delivery
  - Passed by colleague
  - Made along the way
  - Not seen

Supplement to: Gon G, Ali SM, Aunger R, et al. A practical guide to using time-and-motion methods to monitor compliance with hand hygiene guidelines: experience from Tanzanian labor wards. *Glob Health Sci Pract.* 2020;8(4). <https://doi.org/10.9745/GHSP-D-20-00221>

- Fast
  - Yes
  - No
  
- Workload
  - Working alone
  - 1 assistant
  - 2+ assistants
  
- Complicated (if you suspect the woman is having a complication, unless it is obvious, confirm with BA first)
  - No complications
  - Breech delivery: comes out with the buttocks or feet
  - Prolonged labor (ask BA): 12 hours for prima gravida, and 8 hours for multipara
  - Hemorrhage (antenatal): excessive blood loss (>500 mL); confirm with BA
  - Pre-eclampsia/eclampsia (ask BA): high blood pressure (>140/90 on 2 occasions or >160/110) plus either 1+ protein on urine dip or cerebral/visual disturbance (e.g., severe headache/reduced conscious level/blurred vision); or seizure attributable to pre-eclampsia (confirm with BA)
  - Baby floppy and blue
  - Premature rupture of membrane: ask the BA
  - Induction/augmentation: process to induce/speed up labor using drugs
  - Other (e.g., fever)
  - Not able to determine

### **Other procedures**

- Vaginal examination
- Cord clamping and cutting
- Wiping/cleaning vagina
  - Clean material
  - Unclean material
  - Not seen
  
- Other
  - Catheter
  - Manual removal of placenta
  - Suturing
  - Intravenous (IV) fluids (insertion or removal)
  - IV blood line (insertion or removal)
  - Breaking amniotic membranes
  - Nasal suction (newborn)
  - Episiotomy
  - Newborn resuscitation—bag and mask
  - Changing IV bag
  - Adjusting IV line

Supplement to: Gon G, Ali SM, Aunger R, et al. A practical guide to using time-and-motion methods to monitor compliance with hand hygiene guidelines: experience from Tanzanian labor wards. *Glob Health Sci Pract.* 2020;8(4). <https://doi.org/10.9745/GHSP-D-20-00221>

- Vital signs
  - Supporting breastfeeding
  - Injection
  - Wiping baby
- Cord traction
- Postdelivery exam (checking for tears)

### **Hand washing**

- Duration
  - 1–9 seconds
  - $\geq 10$  seconds
  - Not seen
- Soap
  - Yes
  - No
  - Not seen
- Behind fingers
  - Yes
  - No
  - Not seen

### **Drying**

- Single use
- Other
  - Reusable
  - Own gown
  - Air
  - Other
  - Not seen
- None

### **Hand rubbing**

- Duration
  - 1–9 seconds
  - $\geq 10$  seconds
  - Not seen
- Behind fingers
  - Yes
  - No
  - Not seen

### **Gloves**

- Action
  - Add
  - Remove
- Status
  - One hand

Supplement to: Gon G, Ali SM, Aunger R, et al. A practical guide to using time-and-motion methods to monitor compliance with hand hygiene guidelines: experience from Tanzanian labor wards. *Glob Health Sci Pract.* 2020;8(4). <https://doi.org/10.9745/GHSP-D-20-00221>

- Both hands
- Bare hands
