# Supplementary material for: A Practical Guide to Using Time-and-Motion Methods to Monitor Compliance With Hand Hygiene Guidelines: Experience From Tanzanian Labor Wards
Source: PubMed Central journal article supplement (PMC7784080; doi:10.9745/ghsp-d-20-00221), 2020-12-23

### Supplement 4. Changing the Definition of Patient Zone

Using the methods described in Gon et al. 2018, we calculated the compliance with hand washing/rubbing based on the following patient zone definition: the mother’s perineum and thighs, newborn, and any other clean or neutral hand actions. To show how our tool performs with a different definition of the patient zone, we calculated the number of HH opportunities and the hand rubbing/washing compliance for an additional 3 patient zone scenarios described in the Figure below. Based on these results, the hand rubbing/washing compliance did not substantially change as the patient zone widened, although it increased slightly; whereas, the number of HH opportunities decreased as hypothesized.

**Figure.** Patient Zone Scenarios, Number of Opportunities, and Compliance (Green Highlights the Zone)

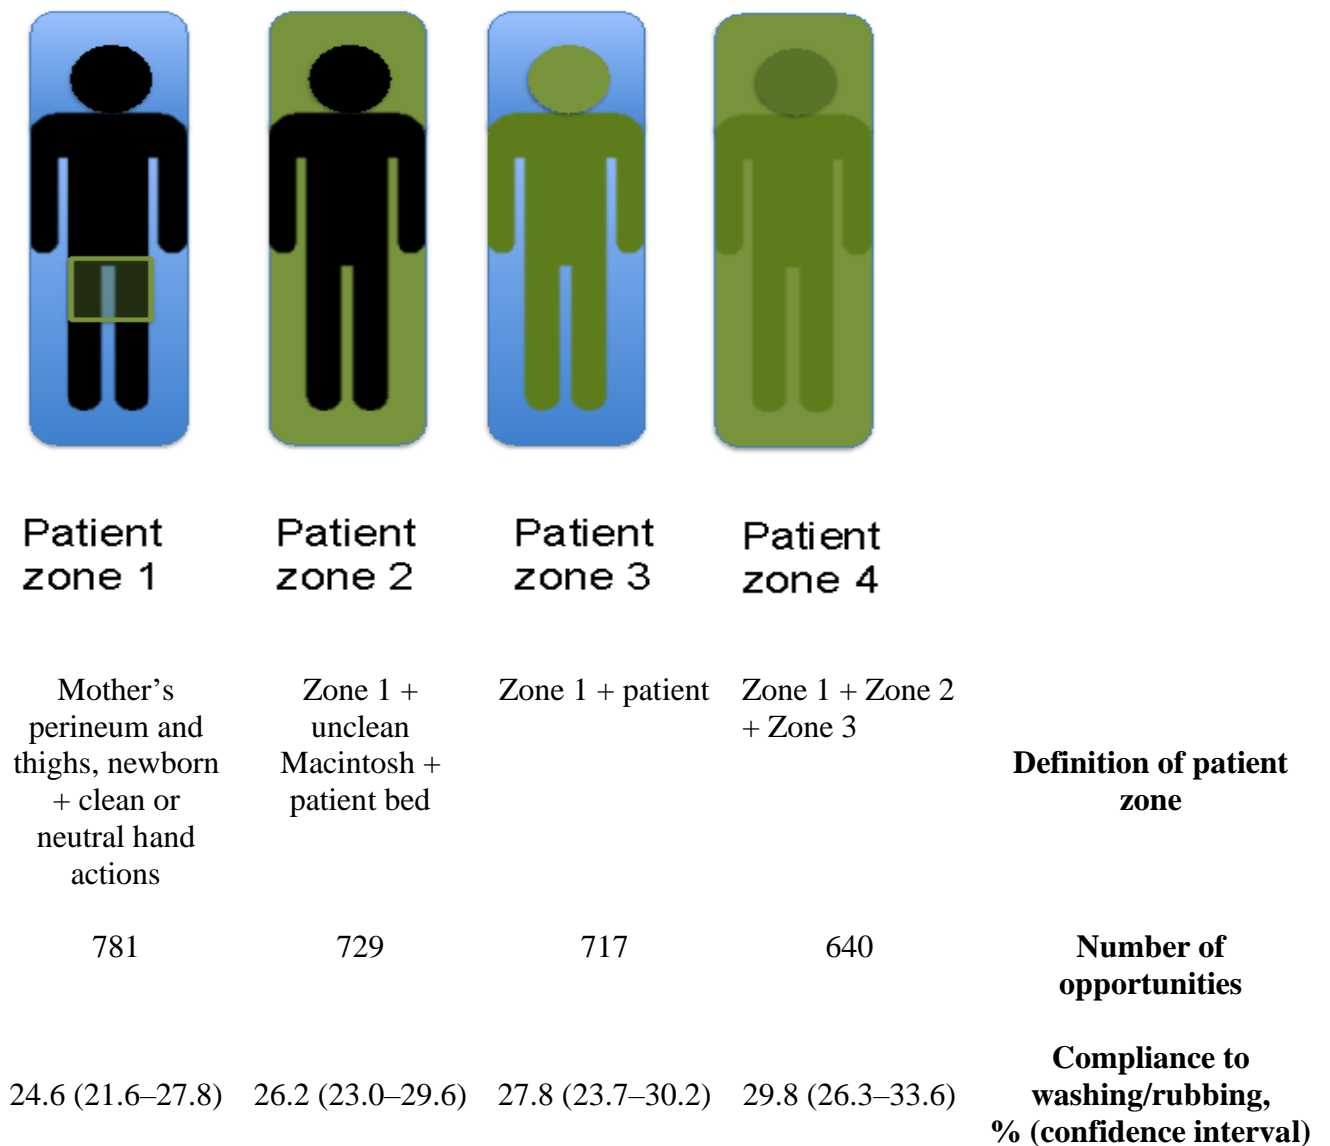

Supplement: 20-00221-Gon-Supplement4.pdf [file 20-00221-Gon-Supplement4.pdf]
